# Supplementary material for: The global repressor FliZ antagonizes gene expression by σS-containing RNA polymerase due to overlapping DNA binding specificity
Source: PubMed Central journal article supplement — Nucleic Acids Res. 2012 Feb 9;40(11):4783–93. doi: 10.1093/nar/gks055 (PMC3367168; doi:10.1093/nar/gks055), 2012-02-09
Supplement: supp_gks055_Pesavento_Supplement_NAR_final.pdf [file supp_gks055_Pesavento_Supplement_NAR_final.pdf]

**Supplementary Data for:**

**The global repressor FliZ antagonizes gene expression by  
 $\sigma^S$ -containing RNA polymerase due to overlapping DNA  
binding specificity**

**Christina Pesavento and Regine Hengge**

Institut für Biologie, Mikrobiologie, Freie Universität Berlin, 14195 Berlin, Germany

## Supplementary Methods

### ***Generation of strains with chromosomal knockout mutations***

Strains used in this study are derivatives of *E. coli* K-12 strain W3110 (1), carrying  $\Delta lacU169$  with the exception of the W3110 wild-type strain used for the primer extension experiment.. The *fliZ::kan* (2) and *mlrA::kan* (3) alleles were described previously. Non-polar in-frame-deletion mutations were obtained by flipping out the insertion cassettes (4). Mutations were transferred by P1 transduction (5).

### ***Construction of plasmids and chromosomal lacZ fusions***

The primers used for plasmid constructions are listed in Table S1 (see below). pFliZ was described previously (2). pFliZ and pFliZ-R108A are derivatives of pCAB18 (6), which is a *tac* promoter expression plasmid based on the low copy number vector pACYC184 (7). Replacement of R108 of FliZ by an alanine residue was achieved by a four primer/two-step polymerase chain reaction (PCR) mutagenesis protocol previously described (8). As external primers the ones used for cloning *fliZ* into pCAB18 (2) were used again. The internal mutagenic primers are listed in Table S1.

The chromosomal transcriptional *flhDC::lacZ* fusions (*flhDC1::lacZ*, *flhDC2::lacZ*, *flhDC3::lacZ*) were isolated using the fusion vector pCAB6 (6). For construction of these three fusions, the primers P*flhDC1-BamHI* and P*flhDC1-HindIII*, P*flhDC1-BamHI* and P*flhDC2-HindIII*, and P*flhDC3-BamHI* and P*flhDC1-HindIII*, respectively, were used. All primers are listed in Table S1. All reporter fusions were transferred to the *att*( $\lambda$ ) location of the chromosome via phage  $\lambda$ RS45 or  $\lambda$ RS74 (9). Single lysogeny was tested by a PCR approach (10). The following *lacZ* fusions were described earlier: *yciR::lacZ* (3), *flgA::lacZ* (6), *yhjH::lacZ* (2).

For overexpression and purification, FliZ and FliZ-R108A with N-terminal intein tags were expressed from pTYB12 (New England Biolabs). *fliZ* and the gene encoding FliZ-R108A were cloned into pTYB12 using the primers listed in Table S1 and plasmids pFliZ or pFliZ-R108A as templates for PCR reactions.

### ***Generation of mutated mlrA promoter DNA-fragments used for electrophoretic mobility assays***

For generation of the mutated *mlrA* promoter variants a derivative of the *lacZ* fusion vector pJL28 containing a DNA fragment comprising the *mlrA* promoter region and part of the translated region (2) was used as a template and pJL28 derivatives carrying mutated *mlrA* promoter DNA mutations were generated by the four primer/two-step PCR mutagenesis protocol (see above) using the pJL-upstream and pJL-downstream external primers and the internal mutagenic primers listed in Table S1 and subsequent digestion of PCR fragments with *BamHI* and *HindIII*. The resulting plasmids served as templates for the isolation of mutated *mlrA* promoter DNA-fragments used for electrophoretic mobility assays. All primers are listed in Table S1.

### ***RNA preparation and primer extension***

RNA preparation and primer extension was performed as described in (11), with alterations. Total RNA was prepared with SV RNA Isolation Kit (Promega) of cells growing in LB medium at 28°C to an OD<sub>578</sub> of 4. Wildtype W3110 (or its *mlrA::kan* mutant derivative) or W3110 containing a derivative of the *lacZ* fusion vector pJL28 containing a DNA fragment comprising the *mlrA* promoter region and part of the translated region (2), were used for RNA isolation. For the detection of the transcriptional start site by primer extension, the primer listed in Table S1 was used as a primer and the reactions were performed at 45°C for 60 min using 10  $\mu$ g of total RNA and 200 U SUPERScript II (Invitrogen) and stopped by a 70°C incubation step for 15 min. The primer was labeled previously with gamma-<sup>32</sup>P-ATP and T4 PNK (Fermentas). As a reference, sequencing reactions were performed with the same labeled

primer using the CycleReader DNA Sequencing Kit (Fermentas). Reactions were stopped by addition of STOP solution from the kit. After heating to 90°C for 3 min, samples were subjected to electrophoresis on 6% PAA 7M Urea sequencing gels and dried before being autoradiographed using a FLA-2000G Imager (Fuji Photo Film, Japan).

### ***SDS page and immunoblot analysis***

Sample preparation for SDS-PAGE and immunoblot analysis were performed as described previously (12). 3 or 6  $\mu\text{g}$  of cellular protein was applied per lane. Polyclonal sera against FliZ, (custom-made by Pineda-Antikörper-Service, Berlin), goat anti-rabbit IgG alkaline phosphatase conjugate (Sigma) and a chromogenic substrate (BCIP/NBT; Boehringer Mannheim) were used. For the determination of cellular FliZ-levels, FliZ band intensities were calculated using the quantification software Image Gauge. Defined amounts of purified FliZ were used as a reference to determine the molecules of FliZ per  $\mu\text{g}$  total cellular protein, taking into account that during log phase growth in LB, 1 ml of cells of an  $\text{OD}_{578}$  of 1 corresponds to 107  $\mu\text{g}$  total cellular protein (5). Numbers of molecules per cell were calculated based on measurements of colony forming units (cfu) per cell mass at different  $\text{OD}_{578}$  along the growth cycle as shown in Fig. S10 (see below).

### ***Overexpression and purification of FliZ and FliZ-R108A***

The *fliZ* gene and the mutant gene encoding FliZ-R108A were cloned into pTYB12 (New England Biolabs) with the primers listed in Table S1, the plasmid was transformed into strain ER2566 (New England Biolabs), cells were grown at 28°C in LB medium supplemented with 100  $\mu\text{g}/\text{ml}$  ampicillin and overexpression was induced by the addition of 0.5 mM IPTG at an  $\text{OD}_{578}$  of approximately 0.8. The culture was then transferred to 16°C for overexpression and cells were harvested the next day. Cells were resuspended in buffer A (500 mM NaCl, 20 mM Tris-HCl at pH 8, 0.1 % Triton X 100, DNaseI (Roche)) and lysed using a French Press. Cell debris was removed by centrifugation and the supernatant was incubated with chitin beads (New England Biolabs) for 1 hour. After washing with buffer B (500 mM NaCl, 20 mM Tris-HCl at pH 8) and equilibration with buffer C (500 mM NaCl, 20 mM Tris-HCl at pH 8, 50mM DTT) the chitin beads with bound protein were incubated over night at 16-18°C for the self-cleavage reaction releasing the protein. The protein was eluted the next day with buffer B and run over a Superdex 75 (16/60) column (GE Healthcare) using buffer D (500 mM NaCl, 20 mM Tris-HCl at pH 8, 0.2 mM DTT). All purification steps were performed at 4°C and/or on ice.

### ***Protein-DNA interaction assays***

Electrophoretic mobility shift assays (EMSA) were performed in 20  $\mu\text{l}$  reaction mixtures including increasing amounts (20-80 nM, only for *flhDC* bandshifts 0-320 nM were used) of purified FliZ or FliZ-R108A proteins, 6 nM DNA (DNA fragment size was 198 - 300 nucleotides; for primers used to amplify DNA fragments and to mutate promoter DNA-fragments, see supplementary table 1), 1  $\mu\text{g}$  poly[d(I-C)] (Roche) as non-specific competitor DNA and reaction buffer containing 10 mM Tris-HCl at pH 7.5, 1 mM EDTA, 5 % glycerol, 10 mM NaCl and 1 mM  $\text{MgCl}_2$ . Reaction mixtures were incubated for 20 min at room temperature and subsequently loaded onto 5 % polyacrylamide gels. Gels were run in 0.5 x TBE buffer (14) and stained with ethidium bromide. The quantification software Image Gauge was used to quantify the photographed polyacrylamide gels.

DNaseI footprint assays were performed as described before (15) after complex formation between DIG-labeled DNA fragments (13 or 26 nM; for primers used to amplify DNA fragments, see supplementary table 1) and increasing amounts of FliZ (0.16-7.45  $\mu\text{M}$ ) in 20  $\mu\text{l}$  reaction mixtures as described above. Protected regions were identified by comparison

with a DNA sequence ladder generated with the CycleReader DNA Sequencing Kit (Fermentas) and the same DIG-labeled primer as for generating the DNA fragment by PCR.

### **Limited proteolysis experiments**

FliZ and FliZ-R108A were incubated with 0.2 BAEE units (12.8 ng) TPCK-Trypsin (Thermo-Scientific) (dissolved in water) per  $\mu\text{g}$  protein or with 1.875 ng proteinase K (Sigma) (dissolved in 50 mM Tris-HCl at pH 8, 10 mM  $\text{CaCl}_2$ ) per  $\mu\text{g}$  protein in buffer D (see above) at 25°C for increasing time intervals. Proteolysis reactions were stopped by the addition of SDS-page sample buffer and digestion products were analyzed by SDS-page with subsequent Coomassie staining.

### **Determination of $\beta$ -galactosidase activity**

$\beta$ -galactosidase activity was assayed by use of *o*-nitrophenyl-  $\beta$ -D-galactopyranoside (ONPG) as a substrate and is reported as  $\mu\text{mol}$  of *o*-nitrophenol per min per mg of cellular protein (5). Experiments showing the expression of *lacZ* fusions along the entire growth cycle were done at least twice, and a representative experiment is shown.

## **Supplementary Table<sup>1</sup>**

### **I. Primers for generating DNA-fragments used for electrophoretic mobility assays**

|                                                                                                                                                                  |                                                                                 |
|------------------------------------------------------------------------------------------------------------------------------------------------------------------|---------------------------------------------------------------------------------|
| <i>mlrA</i> , <i>mlrA-C-13G</i> , <i>mlrA-TC-14/-13GG</i> , <i>mlrA-T12A</i> , <i>mlrA-T-7A</i> , <i>mlrA-T-6C</i> , <i>mlrA-AA-22/-21TT</i> , <i>mlrA-C-24T</i> | 5'-CGATCACTCAAATCGCCTGG-3<br>5'-TAACGCCTCTGCCACGCGCGTAACG-3'                    |
| <i>mlrA-TR</i>                                                                                                                                                   | 5'- ATGGCGCTTTACACAATTGGTG-3'<br>5'- CAGGCTATGTAGATTGCCGCTTTGC-3'               |
| <i>yciR</i> , <i>yciR-C-18G</i>                                                                                                                                  | 5'- GCGCGCCCGGTCGCGTAATCTCCTTTCACG-3'<br>5'- GACTTACATGAAATTAACGGCGGCTAAACGC-3' |
| <i>rpoS</i>                                                                                                                                                      | 5'-ACGTTGGTCAGACCTTGCAGGT-3'<br>5'-TACTGGTTGATGTACTGCTGA-3'                     |
| <i>gadE</i> , <i>gadE-C-13G</i>                                                                                                                                  | 5'- CAAGCTGATAACAACCAGG-3'<br>5'- CTTTCAACTGCCAAAAGCCCTG-3'                     |
| <i>hdeA</i>                                                                                                                                                      | 5'- CGCGTCTAAGAATGCAGTCG-3'<br>5'- GCATTGCTCACAACCTGGCAG-3'                     |
| <i>yjbJ</i>                                                                                                                                                      | 5'- GGTTTGCCGCAACGTGACGG-3'<br>3'- CGTCATATCATCATCGGTC-3'                       |
| <i>csgD</i>                                                                                                                                                      | 5'- CACCGAAATATTTTTTATATGC-3'<br>5'- CAATCTAGCCATTACAAATCTTA-3'                 |
| <i>gadB</i>                                                                                                                                                      | 5'- TATTCGCGTAATATCTCACG-3'<br>3'- GTGGAATAGACTTCGCACC-3'                       |
| <i>malE</i>                                                                                                                                                      | 5'-GGAATTTTCGTGATGTTGCTTGC-3'<br>5'-GGCGGAAAACATCATCGTCG-3'                     |
| <i>gatY</i>                                                                                                                                                      | 5'-CACGCGCACTTTGCTACGGC-3'<br>5'- ATATTGAATGCCGGAACCGC-3'                       |
| <i>chaB</i>                                                                                                                                                      | 5'-CAGAAAGTGTCTGGATATCG-3'                                                      |

<sup>1</sup> Nucleotides in bold indicate mutations introduced, nucleotides in italics indicate restriction sites.

|                        |                                                                     |
|------------------------|---------------------------------------------------------------------|
|                        | 5'-CGGTAGAACGTGCTTTACGC-3'                                          |
| <i>ynhG</i>            | 5'-GCCGCTGCACTTAGCTAAAC-3'<br>5'-GCCGATAATCAACCGCCCAG-3'            |
| <i>malK</i>            | 5'-GCGCACATAAAAATCGCCACG-3'<br>5'-ATACCACGACCTCGCCCCAG-3'           |
| <i>flhDC</i> -long     | 5'-GACTGAGTCAGCCGAGAAG-3'<br>5'-GCTGCAATAAGCAGAACCACC-3'            |
| <i>flhDC</i> -short    | 5'-GACTGAGTCAGCCGAGAAG-3'<br>5'-CCTAAATCGACGCAACTGTAC-3'            |
| <i>flgA</i> (classII)  | 5'-CTGGGATCCGCTTAAATGCCTTTAC-3'<br>5'-GCCAAGCTTCGTTTTATTATCAGC-3'   |
| <i>flgM</i> (classIII) | 5'-CATGGATCCGGGACAGGTAGTCAGCG-3'<br>5'-GAACGAAGCTTACAGGCTTCAGAGG-3' |

## II. Primers for generating DNA-fragments for DNaseI footprint assays

|              |                                                                                 |
|--------------|---------------------------------------------------------------------------------|
| <i>mlrA</i>  | 5'-DIG-CGATCACTCAAATCGCCTGG-3'<br>5'-TAACGCCTCTGCCACGCGCGTAACG-3'               |
| <i>yciR</i>  | 5'-GCGCGCCCGGTGCGTAATCTCCTTTACG-3'<br>5'-DIG-GACTTACATGAAATTAACGGCGGCTAAACGC-3' |
| <i>gadE</i>  | 5'-DIG-GTTCACGAAGGGTAAAGTTC-3'<br>5'-CTTTCAACTGCCAAAAGCCCTG-3'                  |
| <i>hdeA</i>  | 5'-DIG-GATGCATCTGTAACCTCATTG-3'<br>5'-GCATTGCTCACAACCTGGCAG-3'                  |
| <i>flhDC</i> | 5'-TTGTGTGATCTGCATCACGC-3'<br>5'-DIG-AGTTGCGATAAGCTGCAATAAGC-3'                 |

## III. Primer for determining the 5'-end of *mlrA* mRNA by primer extension:

5'-TAACGCCTCTGCCACGCGCGTAACG-3'

## IV. Primers for cloning and mutagenizing the *mlrA*, *gadE* and *yciR* promoters on pJL28

|                          |                                                                                |
|--------------------------|--------------------------------------------------------------------------------|
| pJL-upstream             | 5'-ACCAGCGTTTCTGGGTGAGC-3'                                                     |
| pJL-downstream           | 5'-CGCCAGCTGGCGAAAGGG-3'                                                       |
| <i>mlrA</i> -TC-14/-13GG | 5'-GCAAAACTGCGGGTAAAGTTAAACCGGGACC-3'<br>5'-GGTCCCGGTTTAACTTTACCCGCAGTTTTGC-3' |
| <i>mlrA</i> -T-12A       | 5'-CTGCGTCAAAGTTAAACCGGGAC-3'<br>5'-GTCCCGGTTTAACTTTTGACGCAG-3'                |
| <i>mlrA</i> -T-7A        | 5'-CTGCGTCTAAAGATAAACCGGGACCTC-3'<br>5'-GAGGTCCCGGTTTATCTTTAGACGCAG-3'         |
| <i>yciR</i> -C-18G       | 5'-CGTTTTTCCAAAAGTGGATTAC-3'<br>5'-GTAATCCACTTTTGGAAAAACG-3'                   |
| <i>gadE</i> -C-13G       | 5'-GAAAAGGATGAGATATTCGAAACG-3'<br>5'-CGTTTCGAATATCTCATCCTTTTC-3'               |

## V. Primers for cloning *fliZ* onto pTYB12

|                    |                                   |
|--------------------|-----------------------------------|
| <i>PfliZ</i> -NdeI | 5'-GGTGGTCATATGATGGTGCAGCACCTG-3' |
|--------------------|-----------------------------------|

|                    |                                                  |
|--------------------|--------------------------------------------------|
| <i>PfliZ-EcoRI</i> | 5'-TGGTGAATTCTCAATATATATCAGAAGAAGGCAGGCTGGAGG-3' |
|--------------------|--------------------------------------------------|

#### VI. Primers for mutagenizing *fliZ* on pCAB18

|                      |                                       |
|----------------------|---------------------------------------|
| <i>PfliZ-R108A-f</i> | 5'-CCCAGGTACGGTGGCTGAATATGTCGTTTCG-3' |
| <i>PfliZ-R108A-r</i> | 5'-CGAACGACATATTCAGCCACCGTACCTGGG-3'  |

#### VII. Primers used for generating *lacZ* fusions

|                        |                                       |
|------------------------|---------------------------------------|
| <i>PflhDC1-BamHI</i>   | 5'-CGGGATCCCATCCCATTTTCGATTATTCC-3'   |
| <i>PflhDC1-HindIII</i> | 5'-CCCAAGCTTGTTTCAGCAACTCGGAGG-3'     |
| <i>PflhDC2-HindIII</i> | 5'-AGCAAGCTTCCTAAATCGACGCAACTGTAC-3'  |
| <i>PflhDC3-BamHI</i>   | 5'-CGGGATCCCGTGTAGTGACGAGTACAGTTGC-3' |

## Supplementary Figures

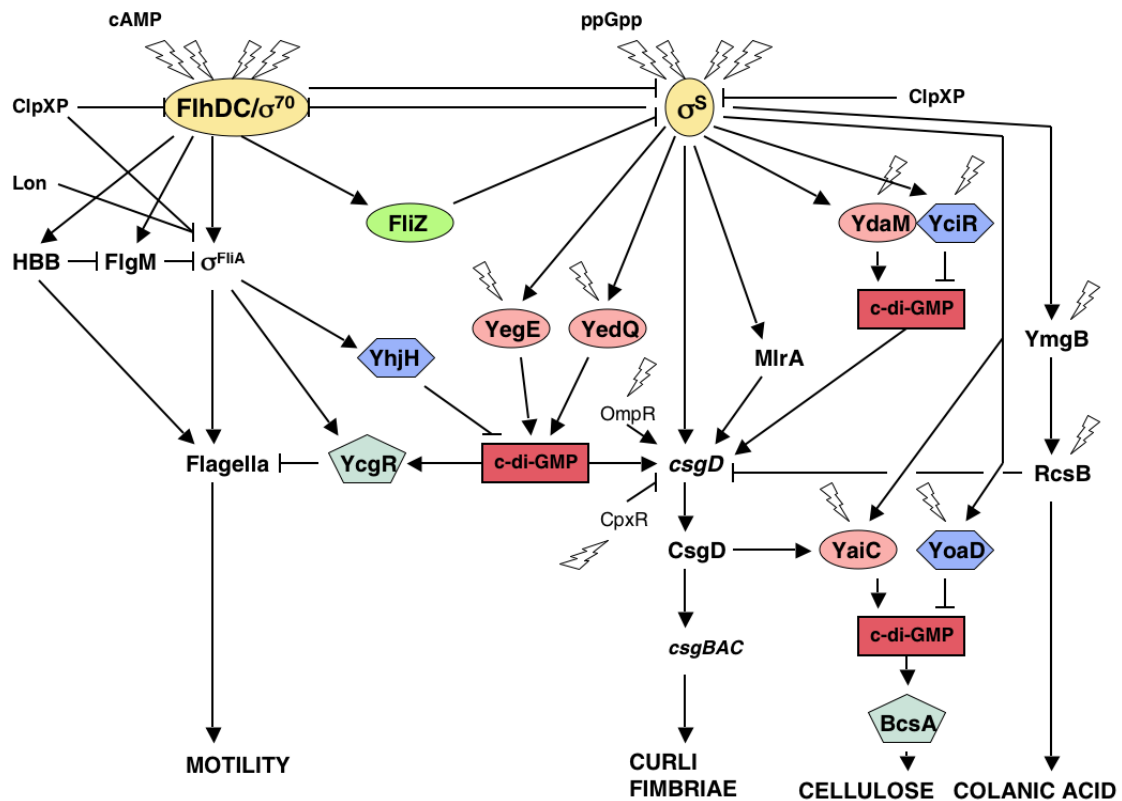

**Figure S1. Inverse coordination of the motile and adhesive life-styles in *E. coli* K-12.** This coordination is part of the more general transition from the foraging life-style of post-exponentially and therefore slowly growing cells to the stationary phase life-style characterized by maintenance metabolism, stress resistance, high cell density and cellular adherence. The flagellar control cascade (FlhDC/FliA) interferes with the activity of the  $\sigma^S$ /CsgD/curli control cascade at two levels: (i) FliZ, which is expressed from a class 2 gene in the flagellar hierarchy, is an inhibitor of  $\sigma^S$  activity at many  $\sigma^S$ -dependent promoters, including those of *ydaM*, *mlrA* and *csgD*; and (ii) the PDE YhjH, which is expressed from a class 3 gene (under  $\sigma^{FliA}$  control), degrades c-di-GMP and thereby keeps motility going, while not allowing the activation of transcription of *csgD* and therefore curli expression. When the flagellar control cascade (including *yhjH* expression) shuts down in mid-post-exponential phase, the DGCs YegE and YedQ, which are increasingly expressed due to now accumulating  $\sigma^S$ , outbalance the PDE activity of YhjH and c-di-GMP can accumulate. Via YcgR, this c-di-GMP interferes with flagellar activity, and, via an unknown effector, stimulates *csgD* transcription. In essence, this c-di-GMP control module acts as a checkpoint that allows curli expression only *after* flagellar gene expression has ceased. In parallel, a second DGC/PDE system, YdaM/YciR, is expressed under  $\sigma^S$  control. The latter system exclusively acts on *csgD* transcription in a way, which is not additive with the effect of the YegE/YhjH system (but both systems are essential for activation). An additional c-di-GMP control module operates downstream of CsgD expression and affects the expression of cellulose biosynthesis. Note, that only relevant genes or proteins under FlhDC and  $\sigma^S$  control are shown here; overall, FlhDC and  $\sigma^S$  activate more than 60 and 500 genes, respectively. For further details and references, see main text. This figure and legend are modified versions of a figure and legend previously published in (16) that are used here with permission.





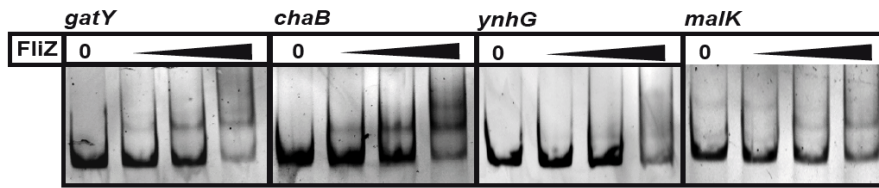

**Figure S3. Electrophoretic mobility shift assays using purified FliZ and DNA-fragments containing promoter regions of FliZ-regulated genes identified in whole genome transcription profiling studies (2).** *gatY* is the first gene in a  $\sigma^S$ -independent operon containing six genes, three of which (*gatA,B,Z*) had been identified as negatively FliZ-controlled. *chaB* and *ynhG* are positively controlled by FliZ and  $\sigma^S$ , while *malK* is positively FliZ-regulated, but does not require  $\sigma^S$  for expression.

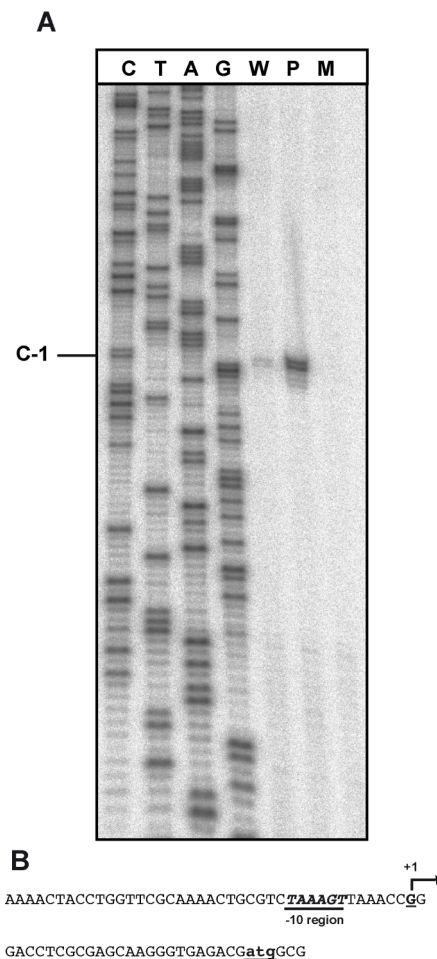

**Figure S4. Determination of the 5'-end of *mlrA* mRNA by primer extension.** For the primer extension experiment, strain W3110 (W) and its derivative carrying a plasmid with a DNA fragment comprising the *mlrA* promoter region and part of the translated region (P) as well as a W3110 *mlrA::kan* mutant derivative (M) were grown in LB medium at 28°C to an  $OD_{578}$  of 4, before RNA samples were taken. Primer extension was performed as detailed below. The experiment was done by F. Mika and A. Possling.

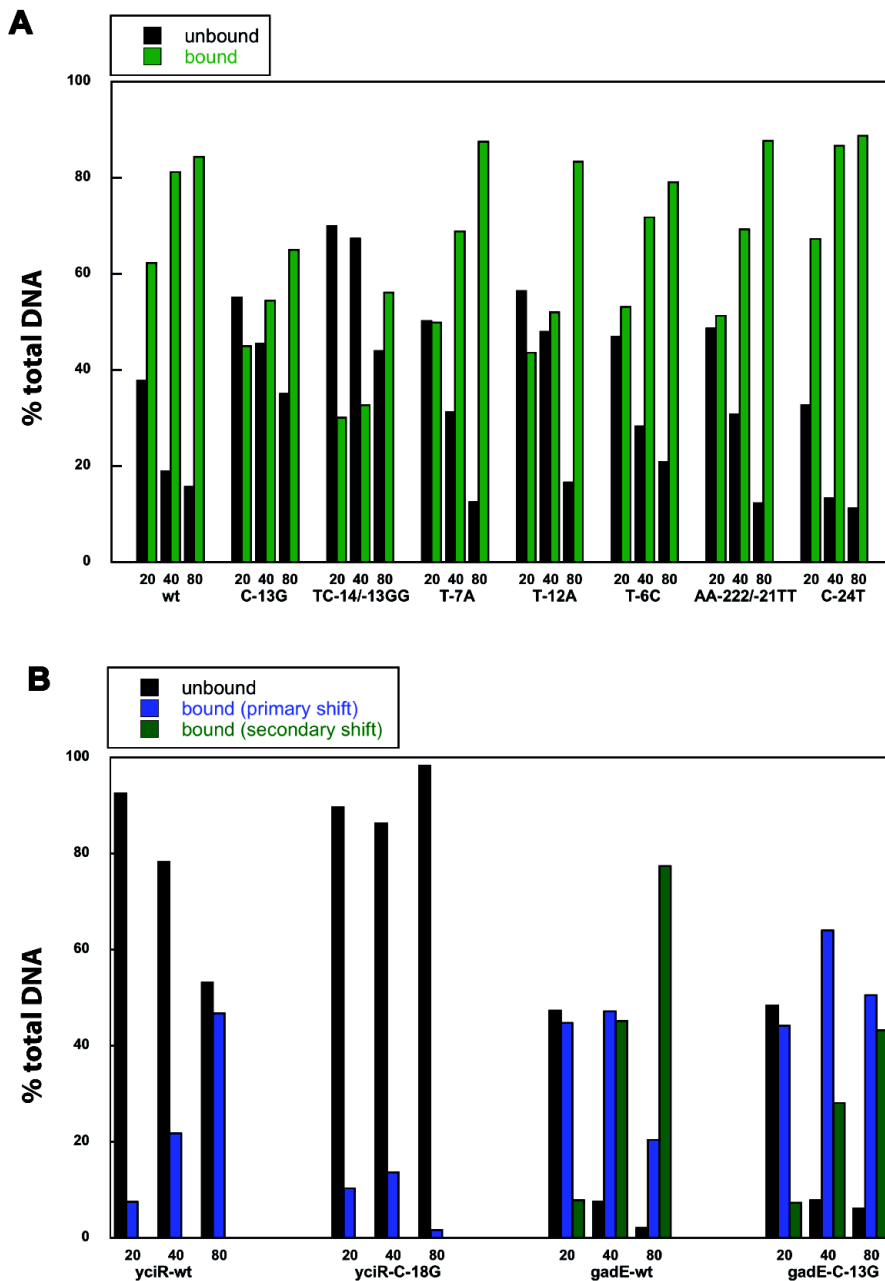

**Figure S5. Quantification of electrophoretic mobility shift assays shown in Fig. 3.** The photographs shown in Fig. 3B (A) and Fig. 3C (B) were used for quantifying the amount of DNA that was either bound by FliZ or remained unbound in each of the three lanes where FliZ had been added. To this end, the total amount of DNA in each lane was set to 100% and the percentage of bound and unbound DNA was subsequently calculated. Quantification was performed using the quantification software Image Gauge. 20, 40, 80 indicates the respective amount of FliZ (in nM) added to the respective EMSA mixture.

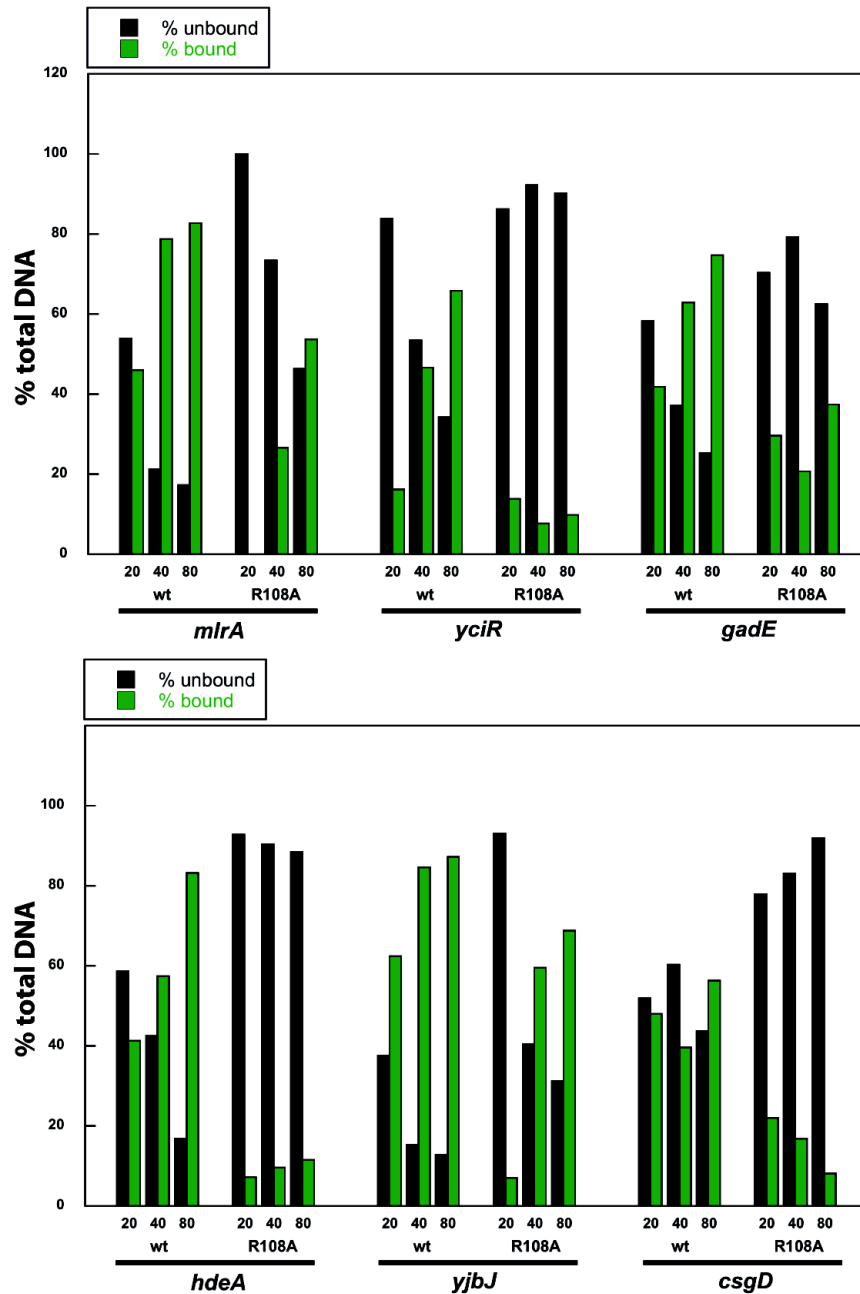

**Figure S6. Quantification of electrophoretic mobility shift assays shown in Fig. 4B.** The photographs shown in Fig. 4B were used for quantification as described in Fig. S5. Note that for *gadE*, *yjbJ* and *csgD*, which show multiple shifts, the primary and secondary shifts have not been listed separately but are summarized in the bound fraction of DNA. 20, 40, 80 indicates the respective amount of FliZ (in nM) added to the respective EMSA mixture.

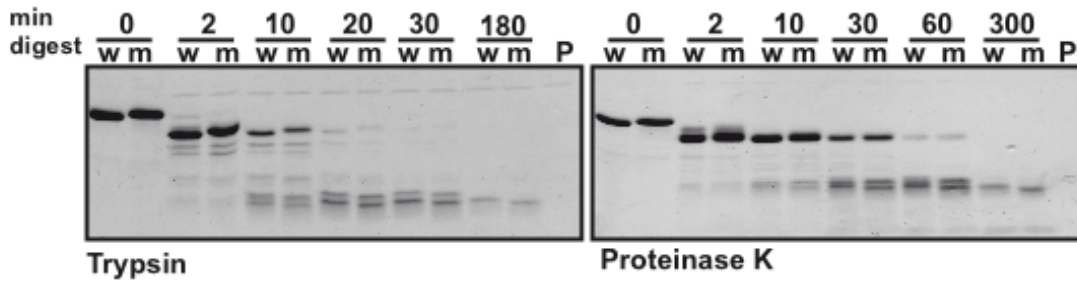

**Figure S7. Limited proteolysis of purified wild-type FliZ (w) and FliZ-R108A (m).** Purified proteins used in the electrophoretic mobility shift assays shown in Fig. 4B were incubated with either trypsin or proteinase K for increasing time intervals and digestion products were analyzed by SDS-page with subsequent Coomassie staining.

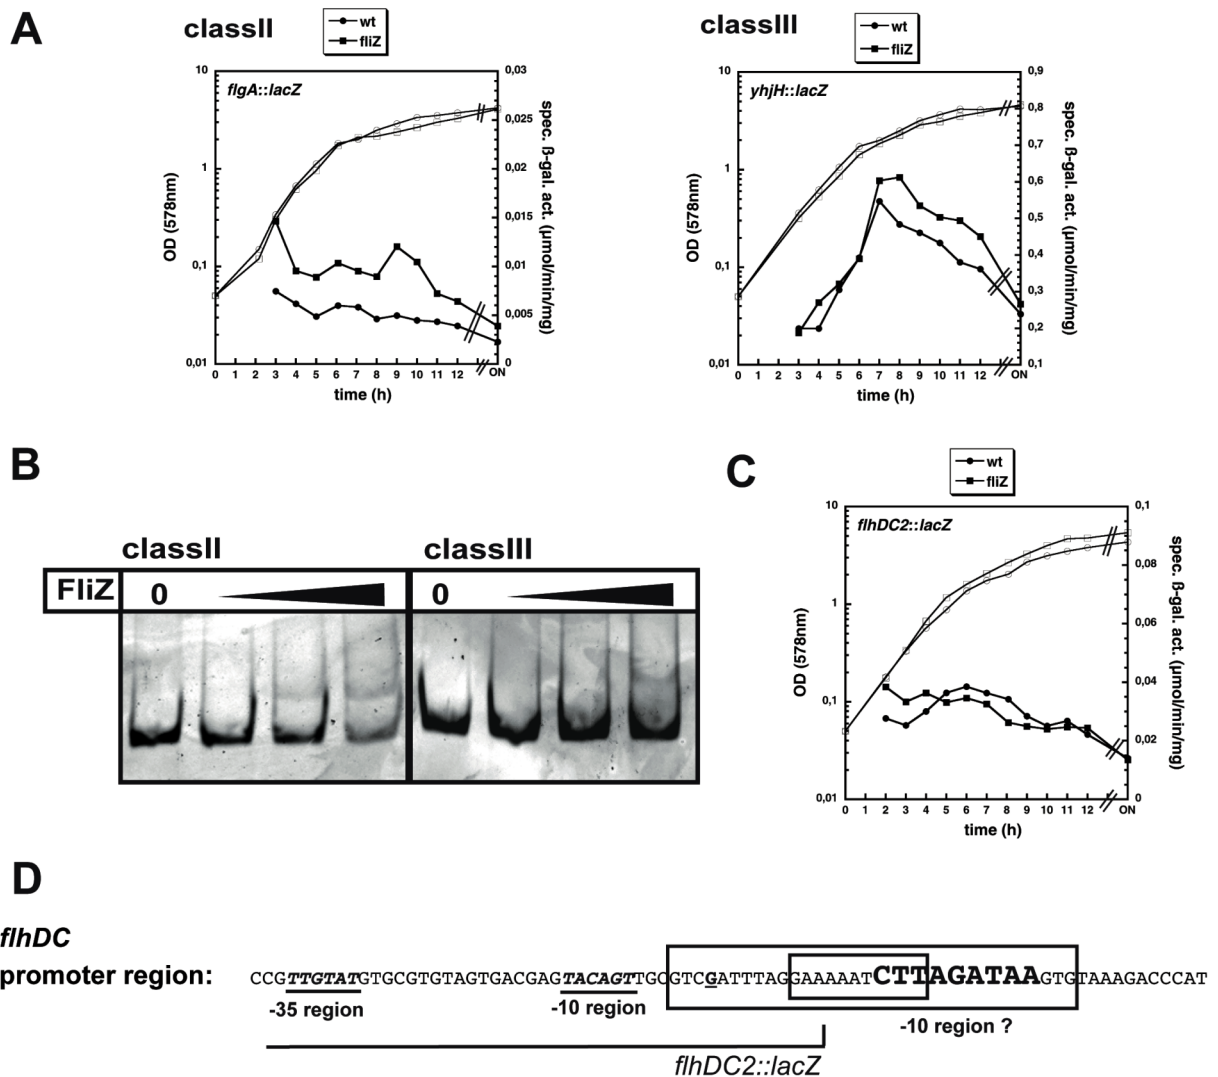

**Figure S8. Role of FliZ in flagellar gene expression.** (A) Expression of a single-copy transcriptional *lacZ* fusion to the class II promoter of the *flgA* gene and a single-copy translational fusion to the class III *yhjH* gene. FliZ affects expression of class II and III genes but this effect is indirect through regulation of *flhDC* because FliZ does not bind to the

promoters of class II (*flgA*) and III (*flgM*) genes *in vitro* as determined in electrophoretic mobility shift assays (B). (C) Expression of a single-copy transcriptional *lacZ* fusion to the *flhDC* promoter that does not contain the -10 region-like element downstream of the *flhDC* transcription initiation site (*flhDC2::lacZ*) does not show differential regulation in the wild-type (wt) and the  $\Delta$ *fliZ* mutant. (D) Sequence of the *flhDC* promoter. Promoter elements are indicated as in Fig. 6F and the figure shows the end point of the region used for construction of the *flhDC2::lacZ* fusion.

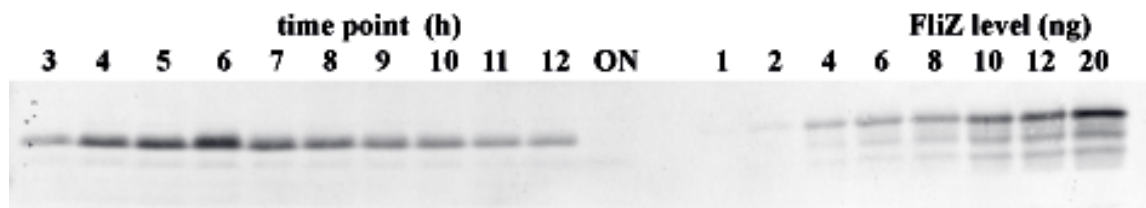

**Figure S9. Quantification of cellular FliZ levels during the growth cycle.** FliZ levels were determined by immunoblot analysis (the blot shown here is the one also shown in Fig. 7), using defined amounts of purified FliZ (shown on the right side of the blot) as a reference for calculating absolute cellular protein levels (data in molecules per  $\mu$ g total cellular protein are given in Fig. 7). FliZ levels in the overnight sample (ON) were below detection.

| $OD_{578}$ | cfu/ml            | cfu/ml· $OD_{578}$ |
|------------|-------------------|--------------------|
| 0.1        | $2.95 \cdot 10^7$ | $3.0 \cdot 10^8$   |
| 0.5        | $1.48 \cdot 10^8$ | $3.0 \cdot 10^8$   |
| 1.0        | $2.95 \cdot 10^8$ | $3.0 \cdot 10^8$   |
| 1.5        | $5.89 \cdot 10^8$ | $3.9 \cdot 10^8$   |
| 2.0        | $8.82 \cdot 10^8$ | $4.4 \cdot 10^8$   |
| 2.5        | $2.08 \cdot 10^9$ | $8.3 \cdot 10^8$   |
| 3.0        | $3.28 \cdot 10^9$ | $1.1 \cdot 10^9$   |
| 3.5        | $3.93 \cdot 10^9$ | $1.1 \cdot 10^9$   |
| 4.0        | $4.59 \cdot 10^9$ | $1.2 \cdot 10^9$   |
| 4.5        | $6.42 \cdot 10^9$ | $1.4 \cdot 10^9$   |
| 5.0        | $8.26 \cdot 10^9$ | $1.6 \cdot 10^9$   |
| o/n (6.5)  | $3.80 \cdot 10^9$ | $0.6 \cdot 10^9$   |

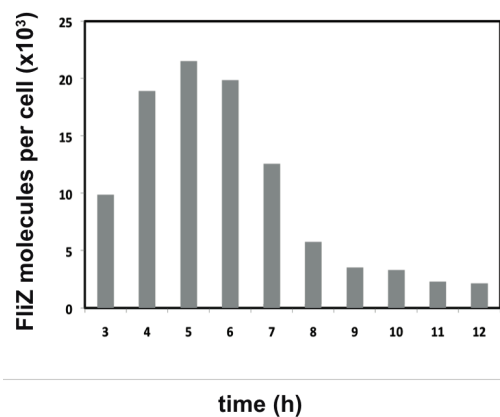

**Figure S10. Determination of FliZ molecule numbers per cell during the growth cycle.** In order to transform the data for cellular FliZ levels (given in Fig. 7) into numbers of molecules per cell, cell numbers were determined (colony forming units, cfu) during growth in LB at 28°C and normalized to the  $OD_{578}$ . The resulting increasing numbers of cells per cell mass reflect the successive miniaturization of *E. coli* cells at an  $OD_{578}$  beyond 1.5 until entry into stationary phase. Based on 1 ml of *E. coli* cells of an  $OD_{578}$  of 1.0 corresponding to 107  $\mu$ g of total cellular protein (5), FliZ molecule numbers per cell were calculated (right panel).

## Supplementary References

1. Hayashi, K., Morooka, N., Yamamoto, Y., Fujita, K., Isono, K., Choi, S., Ohtsubo, E., Baba, T., Wanner, B.L., Mori, H. *et al.* (2006) Highly accurate genome sequences of *Escherichia coli* K-12 strains MG1655 and W3110. *Mol Syst Biol*, **2**, 2006 0007.
2. Pesavento, C., Becker, G., Sommerfeldt, N., Possling, A., Tschowri, N., Mehliis, A. and Hengge, R. (2008) Inverse regulatory coordination of motility and curli-mediated adhesion in *Escherichia coli*. *Genes Dev.*, **22**, 2434-2446.
3. Weber, H., Pesavento, C., Possling, A., Tischendorf, G. and Hengge, R. (2006) Cyclic-di-GMP-mediated signalling within the  $\sigma^S$  network of *Escherichia coli*. *Mol. Microbiol.*, **62**, 1014-1034.
4. Datsenko, K.A. and Wanner, B.L. (2000) One-step inactivation of chromosomal genes in *Escherichia coli* K-12 using PCR products. *Proc. Natl. Acad. Sci. U. S. A.*, **97**, 6640-6645.
5. Miller, J.H. (1972) *Experiments in molecular genetics*. Cold Spring Harbor Laboratory Press, Cold Spring Harbor, New York.
6. Barembruch, C. and Hengge, R. (2007) Cellular levels and activity of the flagellar sigma factor FliA of *Escherichia coli* are controlled by FlgM-modulated proteolysis. *Mol. Microbiol.*, **65**, 76-89.
7. Chang, A.C. and Cohen, S.N. (1978) Construction and characterization of amplifiable multicopy DNA cloning vehicles derived from the P15A cryptic miniplasmid. *J. Bacteriol.*, **134**, 1141-1156.
8. Germer, J., Becker, G., Metzner, M. and Hengge-Aronis, R. (2001) Role of activator site position and a distal UP-element half-site for sigma factor selectivity at a CRP/H-NS-activated sigma(s)-dependent promoter in *Escherichia coli*. *Mol. Microbiol.*, **41**, 705-716.
9. Simons, R.W., Houman, F. and Kleckner, N. (1987) Improved single and multicopy *lac*-based cloning vectors for protein and operon fusions. *Gene*, **53**, 85-96.
10. Powell, B.S., Rivas, M.P., Court, D.L., Nakamura, Y. and Turnbough, C.L., Jr. (1994) Rapid confirmation of single copy lambda prophage integration by PCR. *Nucleic Acids Res.*, **22**, 5765-5766.
11. Bouvier, M., Sharma, C.M., Mika, F., Nierhaus, K.H. and Vogel, J. (2008) Small RNA binding to 5' mRNA coding region inhibits translational initiation. *Mol. Cell*, **32**, 827-837.
12. Lange, R. and Hengge-Aronis, R. (1994) The cellular concentration of the  $\sigma^S$  subunit of RNA polymerase in *Escherichia coli* is controlled at the levels of transcription, translation, and protein stability. *Genes Dev.*, **8**, 1600-1612.
13. Lange, R. and Hengge-Aronis, R. (1991) Growth phase-regulated expression of *bolA* and morphology of stationary-phase *Escherichia coli* cells are controlled by the novel sigma factor sigma S. *J. Bacteriol.*, **173**, 4474-4481.
14. Sambrook, J., Fritsch, E.F. and Maniatis, T. (1989) *Molecular Cloning: a laboratory manual, 2nd edition*. Cold Spring Harbor Laboratory Press, Cold Spring Harbor, New York.
15. Mika, F. and Hengge, R. (2005) A two-component phosphotransfer network involving ArcB, ArcA, and RssB coordinates synthesis and proteolysis of  $\sigma^S$  (RpoS) in *E. coli*. *Genes Dev.*, **19**, 2770-2781.
16. Hengge, R. (2010) In Storz, G. and Hengge, R. (eds.), *Bacterial Stress Responses*. ASM Press, Washington, D.C., pp. 251-289.

17. Swalla, B.M., Gumport, R.I. and Gardner, J.F. (2003) Conservation of structure and function among tyrosine recombinases: homology-based modeling of the lambda integrase core-binding domain. *Nucleic Acids Res.*, **31**, 805-818.
18. Marchler-Bauer, A. and Bryant, S.H. (2004) CD-Search: protein domain annotations on the fly. *Nucleic Acids Res.*, **32**, W327-331.
19. Chenna, R., Sugawara, H., Koike, T., Lopez, R., Gibson, T.J., Higgins, D.G. and Thompson, J.D. (2003) Multiple sequence alignment with the Clustal series of programs. *Nucleic Acids Res.*, **31**, 3497-3500.
